# Targeted redesign of suramin analogs for novel antimicrobial lead development

*Debayan Dey<sup>1#</sup>, Suryanarayanarao Ramakumar<sup>2</sup>, Graeme L. Conn<sup>1,3#</sup>.*

<sup>1</sup>Department of Biochemistry, Emory University School of Medicine, Atlanta, GA 30322, USA

<sup>2</sup>Department of Physics, Indian Institute of Science, Bangalore-560012, India

<sup>3</sup>Emory Antibiotic Resistance Center (ARC).

#Corresponding author: Debayan Dey, email: [debayan.dey@emory.edu](mailto:debayan.dey@emory.edu) or Graeme L. Conn,

email: [gconn@emory.edu](mailto:gconn@emory.edu)

## 1 **ABSTRACT**

2 The emergence of new viral infections and drug resistant bacteria urgently necessitates expedient  
3 therapeutic development. Repurposing and redesign of existing drugs against different targets is  
4 one potential way in which to accelerate this process. Suramin was initially developed as a  
5 successful anti-parasitic drug but has also shown promising antiviral and antibacterial activities.  
6 However, due to its high conformational flexibility and negative charge, suramin is considered  
7 quite promiscuous towards positively charged sites within nucleic acid binding proteins.  
8 Although some suramin analogs have been developed against specific targets, only limited  
9 structure activity relationship (SAR) studies were performed, and virtual screening has yet to be  
10 used to identify more specific inhibitor(s) based on its scaffold. Using available structures, we  
11 investigated suramin's target diversity, confirming that suramin preferentially binds to protein  
12 pockets which are both positively charged and enriched in aromatic or leucine residues. Further,  
13 suramin's high conformational flexibility allows adaptation to structurally diverse binding  
14 surfaces. From this platform, we developed a framework for structure- and docking-guided  
15 elaboration of suramin analog scaffolds using virtual screening of suramin and heparin analogs  
16 against a panel of diverse therapeutically relevant viral and bacterial protein targets. Use of this  
17 new framework to design potentially specific suramin analogs is exemplified using the SARS-  
18 CoV-2 RNA-dependent RNA polymerase (RdRp) and nucleocapsid protein, identifying leads  
19 that might inhibit a wide range of coronaviruses. The approach presented here establishes a  
20 computational framework for designing suramin analogs against different bacterial and viral  
21 targets and repurposing existing drugs for more specific inhibitory activity.

## 22 INTRODUCTION

23 The rise of multi-drug resistant bacteria and emergence of new infectious viral pathogens, as  
24 exemplified by SARS-CoV-2 the cause of the COVID-19 pandemic, are dual major threats to  
25 human health world-wide. Effective new antimicrobials are thus urgently needed, but processes  
26 for their identification and development are often long and expensive. However, repurposing of  
27 existing, approved drugs and redesign of their activity against new targets represents one of the  
28 most promising opportunities to by-pass many of these hurdles<sup>1</sup>.

29 The unique challenges posed by COVID-19 have resulted in testing of a large array of  
30 antivirals, anti-inflammatory drugs, and other potential inhibitors of receptors of viral attachment  
31 for their effectiveness against SARS-CoV-2. For example, the nucleoside analog remdesivir,  
32 originally developed for Ebola virus, was found to be effective against SARS-CoV-2 with high  
33 selectivity, leading to its use for treatment of COVID-19 in many countries<sup>2</sup>. Other antivirals like  
34 favipiravir, ribavirin, darunavir, and lopinavir-ritonavir combination are either already in use or  
35 in clinical trials for SARS-CoV-2 treatment<sup>3</sup>. In addition, non-antivirals drugs like  
36 dexamethasone, which is used commonly to treat inflammatory and autoimmune conditions<sup>4</sup>,  
37 and the anti-parasitic ivermectin have shown potential as COVID-19 treatments<sup>5,6</sup>.

38 Suramin was among the first anti-infective agents developed in the early 1920s and has  
39 also recently been shown to inhibit the progression of SARS-CoV-2 infection in human airway  
40 epithelial cell culture model<sup>7</sup>. Suramin appears on the World Health Organization's List of  
41 Essential Medicines and has a long history of clinical use, with application over the last century  
42 in treating African Trypanosomiasis (sleeping sickness) caused by *Trypanosoma brucei*<sup>8</sup>, and  
43 other parasitic infections including onchocerciasis (African river blindness), leishmaniasis and  
44 malaria<sup>9-11</sup>. With its long history of successful use as an anti-parasitic, suramin and its analogs

45 have also found use in wide variety of other treatments, such as anti-cancer agents, antivirals,  
46 and venom antidotes<sup>12</sup>.

47 Suramin was found to exhibit broad antiviral properties through distinct activities against  
48 components of diverse viruses. For example, through binding to glycoprotein gp120 suramin  
49 inhibits attachment of HIV to host T-cells<sup>13</sup>. Suramin also limits host cell entry of several other  
50 viruses, including herpes, dengue and hepatitis C virus<sup>14-16</sup> and also inhibits enteroviral  
51 attachment to human host cells by binding to their nucleocapsid protein<sup>17</sup>. Suramin also inhibits  
52 some processes in viral replication, for example through binding to Zika virus NS2B/NS3  
53 proteinase<sup>18</sup> or to the RNA-dependent RNA polymerase (RdRp) of norovirus, chikungunya virus  
54 and SARS-CoV-2<sup>19-21</sup>. Suramin and related compounds thus hold promise as an initial lead for  
55 multiple targets, including viral RdRp and nucleocapsid, as well as future structure-activity  
56 relationship (SAR) studies or structure-guided design of suramin analogs as new therapeutics.

57 Although suramin and its analogs have been studied for many decades, including some  
58 SAR studies<sup>22, 23</sup>, many fundamental questions remain regarding the origin of their promiscuity,  
59 binding pocket preferences, and mode of on-target interaction. Suramin's effectiveness in  
60 targeting viral nucleocapsid and RdRp has not yet been exploited to rationally design more  
61 selective and less toxic analogs based on this scaffold. Moreover, to our knowledge, no  
62 systematic high-throughput or virtual screening has been performed for suramin analogs for any  
63 viral targets (e.g. RdRp or nucleocapsid) to explore potential lead molecules. Here, we examine  
64 the structural basis of suramin's ability to bind to diverse proteins and use these insights to  
65 develop a framework involving virtual screening, precision docking and docking-guided  
66 elaboration of the suramin scaffold against different therapeutically important bacterial and viral  
67 targets. Docking studies with a panel of nine diverse proteins reveals high-scoring suramin

68 analogs to be more conformationally selective than suramin and to have greater target specificity.  
69 Finally, SARS-CoV-2 RNA-dependent RNA polymerase (RdRp) and nucleocapsid are used to  
70 exemplify the process of suramin analog redesign to generate novel analogs with the potential to  
71 bind with higher affinity and target specificity. Evolutionary analyses suggest that the optimized  
72 leads could potentially inhibit a wide range of coronaviruses<sup>24</sup>. This study thus sets out a  
73 computational framework using structure- and docking-guided ligand elaboration that can  
74 support redesign and repurposing existing antimicrobials for new, specific inhibitory activities.

75

## 76 **RESULTS**

### 77 **Structural basis for suramin protein target site diversity**

78 Suramin is a C<sub>2</sub> symmetric molecule with each half comprised of a trisulfonated naphthyl ring  
79 with negative charge at physiological pH, connected via amide linkages to toluene and phenyl  
80 rings (**Fig. 1A**). Suramin is highly flexible with a total of 10 rotatable bonds (**Fig. 1A**;  $\alpha_{1-5}$  and  
81  $\alpha_{1'-5'}$ ) and no substituent groups on the four central rings that might otherwise restrict its  
82 conformational freedom. This flexibility, and thus conformational adaptability, is likely a key  
83 factor in suramin's ability to interact with diverse target sites in many proteins, but also its high  
84 off-target binding. Similarly, another polyanionic class of molecules similar to suramin, the  
85 glycosaminoglycans (GAGs) such as heparin (**Fig. 1B**), can bind multiple diverse protein targets  
86 but also suffer the limitation of high off-target binding.

87 To begin defining the residue preferences in suramin binding pockets, we examined  
88 structures of several suramin complexes with diverse proteins (**Table S1**). These structures  
89 included the *Leishmania mexicana* pyruvate kinase (PDB 3PP7; **Fig. 1C**) with suramin bound in

90 its ATP binding site, snake venom protein myotoxin (PDB 1Y4L; **Fig. 1D**), and two human  
91 protein

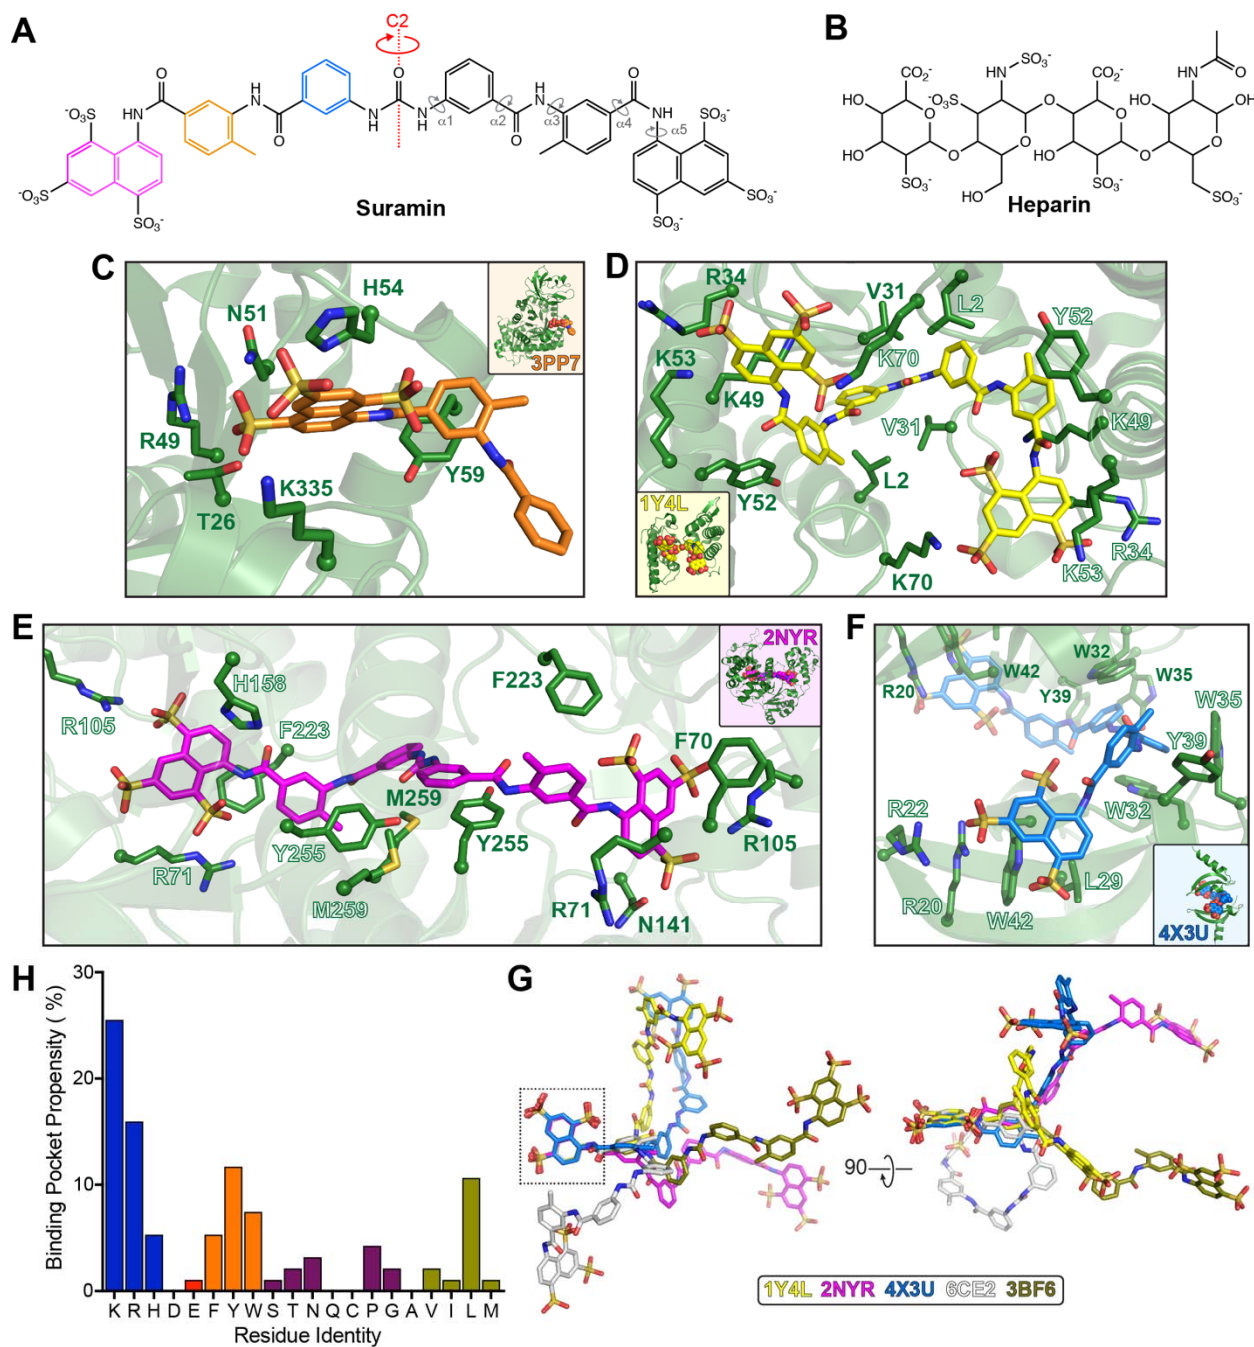

92  
93 **Figure 1. Structural basis for suramin protein target site diversity.** Chemical structures of **A**,  
94 suramin and **B**, heparin. Crystal structures of suramin (or partial fragment) bound to: **C**,  
95 *Leishmania mexicana* pyruvate kinase (PDB 3PP7), **D**, snake venom protein myotoxin (PDB  
96 1Y4L), **E**, NAD<sup>+</sup>-dependent protein deacetylase SIRT5 (PDB 2NYR), and **F**, epigenetic reader

97 chromobox homolog 7 (PDB 4X3U). **H**, Residue propensities in the suramin binding pockets in  
98 targets shown in *panels C-F* and **Figure S1**. **G**, Superposition via the boxed sulfo-naphthyl ring  
99 of suramin molecules from co-crystal structures with diverse targets (PDB 1Y4L, 2NYR, 4X3U,  
100 6CE2 and 3BF6).

101  
102 targets for treatment of cancer, metabolic and neurological diseases, the NAD<sup>+</sup>-dependent protein  
103 deacetylase sirtuin 5 (SIRT5; PDB 2NYR; **Fig. 1E**) and the epigenetic reader chromobox  
104 homolog 7 (PDB 4X3U; **Fig. 1F**)<sup>10, 25-27</sup>. A number of general features of the interaction  
105 networks within the suramin binding pockets are immediately apparent. The trisulfo-naphthyl  
106 ring interacts with positively charged residues (Arg, Lys, His) via its sulfate groups while the  
107 naphthyl ring makes  $\pi$ -mediated interactions with aromatic residues, Phe, His, Tyr and Trp (**Fig.**  
108 **1C-F**). Aromatic residues with a polar ring atom may also make a hydrogen bonding interaction  
109 with a sulfonate group, coordinating both features of the trisulfonated naphthyl ring. The toluene  
110 and central phenyl rings of suramin are additionally stabilized by networks of aromatic and  
111 hydrophobic residues (**Fig. 1C-F**).

112 Suramin complexes with viral proteins have also been determined for norovirus RdRp  
113 (PDB 3UR0)<sup>19</sup> and bunyavirus nucleocapsid (PDB 4J4V)<sup>28</sup>, but these offer only partial snapshots  
114 of favored suramin binding sites as just a portion of suramin could be modeled in each crystal  
115 structure (**Fig. S1**). In the RNA binding channel of norovirus RdRp34, the trisulfo-naphthyl ring  
116 of suramin is anchored by both positive (Lys171 and Arg392) and aromatic (Trp42) residues,  
117 while the central region is stabilized by Gln66, Lys180, Lys181, Arg245 and Lys68. The  
118 bunyavirus nucleocapsid forms a pentameric complex with an RNA binding cavity on the inner  
119 edge of the ring-like assembly where suramin also interacts<sup>28</sup>. Again, each of the modeled  
120 suramin rings is stabilized by multiple ionic, hydrogen bonding and aromatic/ hydrophobic

121 stacking interactions, including residues Asn66, Lys67 and Arg95 with the trisulfo-naphthyl ring,  
122 and Arg64, Thr63, Gly65, Phe177 and Pro127 the two central rings (**Fig. S1B**). Thus, visual  
123 inspection of these viral protein structures reveals overall consistent trends in suramin's binding  
124 pocket residue interaction preferences with other proteins of diverse origin and function.

125 More detailed analyses of available suramin-bound protein structures reveal consistent  
126 features in the binding pocket physicochemical composition, including strong enrichment of  
127 specific residues (**Fig. 1G**). Positively charged Lys and Arg are highly enriched in the pocket  
128 compared to the full protein (25% and 15%, respectively, of all interacting residues), while His is  
129 more modestly enriched (5%), but, as noted, can make both aromatic stacking and charged  
130 interactions. The absence of negatively charged residues (~1.5% combined) also points towards  
131 suramin's strong preference for positively charged binding regions, such as nucleic acid binding  
132 sites. In total, polar residues are slightly less favored (~12 % total) as compared to aliphatic  
133 hydrophobic residues (~14%), with a marked preference for Leu (10.6 %) among the latter group  
134 (**Fig. 1G**). This may be due to leucine's aliphatic stacking potential with the aromatic rings of  
135 suramin. Aromatic residues (Trp, Tyr and Phe; together ~25% of total) are also strongly enriched  
136 in suramin binding sites.

137 Suramin's binding promiscuity for diverse protein targets is likely underpinned by its  
138 high inherent conformational flexibility, as revealed by superposition of protein-bound suramin  
139 molecules using one trisulfo-naphthyl ring (**Fig. 1H**). Suramin bound to thrombin (PDB 3BF6)  
140 adopts the most extended conformation we identified (and is used hereafter as the reference),  
141 with the trisulfo-naphthyl rings ~29 Å apart. Suramin bound to SIRT5 (PDB 2NYR) also has a  
142 linear conformation but with differences in the  $\alpha_2$ ,  $\alpha_3$ ,  $\alpha_2'$ , and  $\alpha_3'$  angles (i.e. the dihedrals  
143 between the toluene and phenyl rings). In contrast, suramin bound to myotoxin I (PDB 6CE2)



144 has its trisulfo-naphthyl rings only  $\sim 14$  Å apart and is observed in a highly bent conformation.  
145 Similarly, suramin bound to myotoxin II (PDB 1Y4L) adopts a highly bent conformation, but  
146 distinguished by additional changes in the  $\alpha 1$  and  $\alpha 1'$  dihedral angles. To further assess the low  
147 energy conformations of suramin and two analogs, NF449 and NF023, we used a computational  
148 *Monte Carlo* conformational scan which revealed 116 potential low energy conformational states  
149 for suramin, while NF449 and NF023 each have 143 and 80, respectively.

150 Collectively, these structural and computational conformation analyses confirm suramin  
151 to be a highly flexible ligand, with multiple potential hinge points, that can adopt a large variety  
152 of conformations to fit a given target protein binding pocket. Further, these favored binding  
153 pockets are positively charged and enriched with aromatic and Leu residues, such as most  
154 commonly occur in large interfaces or in protein regions which bind to nucleic acids or  
155 nucleotides.

156

### 157 **Identification of suramin and heparin analogs targeting viral and bacterial proteins**

158 Previous studies have identified inhibitory activity of suramin against bacterial and viral  
159 proteins, but no computational or high-throughput screens have been conducted with suramin  
160 analogs against such targets. Structure-guided analysis of suramin analogs bound to various viral  
161 or bacterial targets using large-scale docking studies could, however, allow for downstream  
162 rational design of novel analogs with improved affinity and specificity towards a desired target.  
163 We devised a strategy to accomplish this goal using docking studies with suramin and heparin  
164 analogs and using docking poses of the latter set of ligands to guide design of new suramin  
165 analogs with substituents positioned to make additional protein target-specific interactions (**Fig.**  
166 **2**).

167 Nucleic acid binding proteins in bacteria and viruses play crucial roles in the processing  
168 of genetic information and thus represent important targets for therapeutic development. Due to  
169 suramin's affinity for nucleic acid binding proteins, a test panel of diverse protein targets known  
170 to interact with DNA or RNA was selected. Viral proteins, known to be bound by suramin,

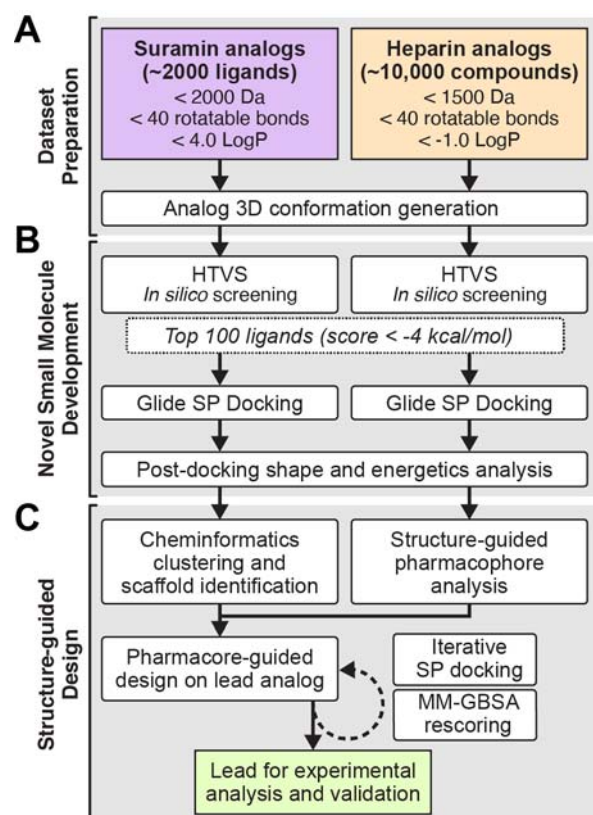

171  
172 **Figure 2. Computational workflow used in this study.** A, Suramin and heparin analog sets  
173 were retrieved from PubChem with the indicated parameter filters and subject to conformer  
174 generation in LigPrep (Schrödinger Software). B, Suramin and heparin analog sets were used for  
175 separate HTVS and the resulting top 100 ligands then subject to higher precision (SP) docking in  
176 Glide (Schrödinger Software). C, Following further shape and energetic analysis,  
177 chemoinformatics was used to determine different fragments of top scoring suramin analogs. For  
178 heparin analogs, the top poses corresponding to the top selected suramin analog for each target  
179 was next used for pharmacophore-based identification of regions in the suramin analog which  
180 could be substituted to improve its predicted affinity and target specificity. The iterative process

181 of ligand re-design employed further SP docking and/or MM-GBSA. Identified novel analogs  
182 would next be used as leads for experimental analysis and validation.

183  
184 included RdRp of Norovirus and SARS-CoV-2, which is involved in replication and  
185 transcription of the viral RNA genome<sup>19, 21</sup>; nucleocapsid of bunyavirus and SARS-CoV-2,  
186 which is involved in packaging the viral RNA genome and virion assembly, and thus of critical  
187 importance in viral infection<sup>17, 28, 29</sup>; and, human immunodeficiency virus type 1 (HIV-1) protein  
188 gp120, for which binding to galactosylceramide on human colon epithelial cells is blocked by  
189 suramin<sup>13, 30</sup>. To further diversify the protein target set, we included four bacterial proteins:  
190 DNA-binding protein HU (HU), DNA recombination protein RecA (RecA), DNA-binding  
191 protein Fis (Fis), and the thiostrepton-resistance methyltransferase (TsnR). HU and Fis are global  
192 regulators which play important roles in bacterial gene regulation, biofilm development and  
193 maintaining nucleoid architecture<sup>31-34</sup>, while RecA is an essential DNA recombination and repair  
194 protein known to be targeted by suramin<sup>35</sup>. Finally, TsnR is a ribosomal RNA methyltransferase  
195 that confers resistance to the antibiotic thiostrepton<sup>36</sup>, and represents a wider group of RNA  
196 modifying enzymes that are promising targets for novel drugs to break antibiotic resistance. To  
197 generate the ligand sets, we next used a small panel of known biosimilars (**Table S2**) in a  
198 PubChem search which identified ~2,000 and ~10,000 analogs of suramin and heparin,  
199 respectively (**Fig. 2A**).

200 Using the protein target panel and suramin/ heparin analog sets, high-throughput virtual  
201 screening (HTVS; **Fig. 2B**) in the Glide module of the Schrödinger software produced a wide  
202 range of binding scores, typically ranging from -1.0 to -9.0 kcal/mol, but with large differences  
203 in distribution and average score for each protein target (**Fig. 3A,B**). Among the bacterial  
204 proteins, suramin analogs bind on average more tightly to Fis and TsnR (mean binding score -5.7

205 and -5.9 kcal/mol, respectively) compared to HU and RecA (-5.1 and -4.6 kcal/mol, respectively;  
206 **Fig 3A**). HIV protein gp120 was predicted to be bound less tightly with a mean score of -3.6  
207 kcal/mol, whereas both suramin and heparin analogs docked viral RdRp with comparatively  
208 higher score (**Fig. 3A,B**).

209 Among the top 100 scoring suramin and heparin analogs identified by HTVS, more than  
210 ~50% of these ligands bind to only a single protein among the nine targets (**Fig. 3C,D**).  
211 Approximately 30% of the remaining ligands in each set bind to only two or three receptors, with  
212 just a small fraction showing greater promiscuity (high docking score for 4 or more targets). This  
213 result indicates that virtual screening-based using suramin or heparin analogs can identify ligands  
214 with greater selectivity for diverse protein targets compared to using either suramin or heparin  
215 individually.

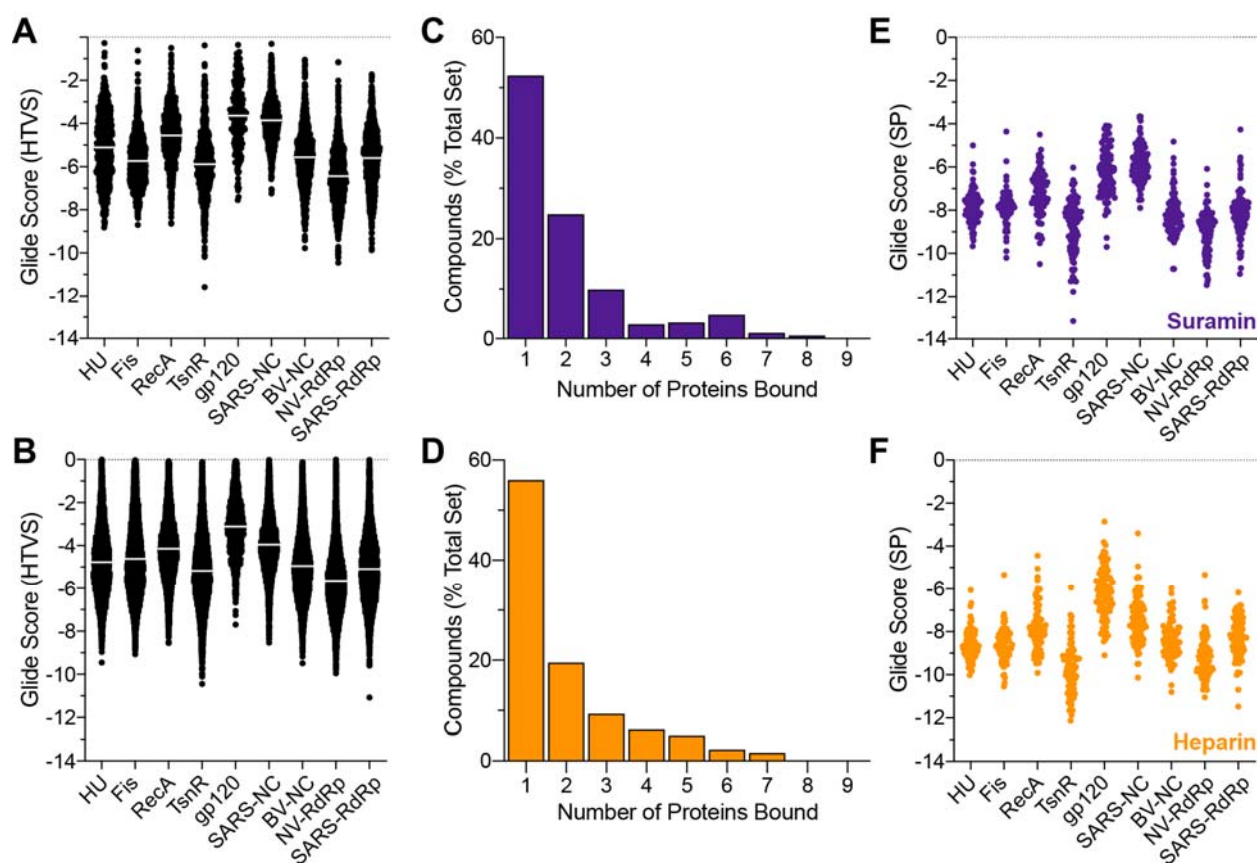

216

217 **Figure 3. Virtual screening and precision docking identify suramin analogs with increased**  
218 **target specificity.** HTVS docking scores for **A**, suramin and **B**, heparin analogs against bacterial  
219 targets HU, Fis, RecA and TsnR; and, viral targets gp120, SARS-CoV-2 and norovirus RdRp,  
220 and SARS-CoV-2 and bunyavirus nucleocapsid (SARS-NC and BV-NC, respectively). A high  
221 percentage of both **C**, suramin and **D**, heparin analogs bind to only one or two targets within the  
222 protein panel used, suggesting that virtual screening has identified more specific leads as  
223 compared to the parent molecules, suramin and heparin. **E,F**, SP Glide docking scores for the top  
224 100 ligands from HTVS for suramin and heparin analogs, respectively.

225 The top 100 suramin and heparin analogs from HTVS against each target protein were  
226 next subject to more accurate docking pose and binding score calculation using Standard  
227 Precision (SP) Glide (**Fig. 2B** and **Fig. 3E,F**). An improvement in the docking score was  
228 observed for many analogs due to the ligand conformational sampling used in the SP Glide  
229 docking method as compared to “rigid” ligand docking of HTVS. However, SP Glide docking  
230 had a very similar trend in docking score distribution for each set of top 100 analogs (**Fig. 3E,F**).  
231 Heparin analogs bind modestly better than those of suramin, likely due to their greater overall  
232 conformational flexibility and number of hydrogen bond donors/acceptors, which allow them  
233 more readily adapt to the wide variety of positively charged surfaces in these target proteins. The  
234 top scoring ligands from SP docking (**Tables S3** and **S4**, and Supplementary File “Top 100  
235 docking results”) were then selected for subsequent elaboration of the suramin scaffold and are  
236 hereafter named beginning with “Sur” and “Hep” for suramin and heparin analogs, respectively.

237

### 238 **Strategy for docking-guided elaboration of the suramin scaffold**

239 To facilitate suramin analog lead redesign for increased target selectivity and affinity, the top  
240 scoring suramin analogs for each protein target were visually inspected post-docking and then  
241 superposed with the top scoring heparin analog identified in the same binding site. The heparin

242 analog set contains ligands that are typically more conformationally flexible and enriched in  
243 potential hydrogen bond donors/ acceptors. While these features would make the heparin analogs  
244 themselves poor leads for specific interactors, comparison of the bound analogs can direct  
245 identification of sites within the corresponding suramin analog that can be further substituted to  
246 make additional interactions with the target protein (**Fig. 2C**). As an example, structural analysis  
247 of the top suramin and heparin analogs directed against HU and the resulting suramin analog  
248 redesign strategy is described below.

249 HU interacts with DNA as a dimer via a positively charged binding cleft, lined with Lys  
250 and Arg residues from both protomers. Sur-1 binds to HU in this cleft with the highest affinity of  
251 the suramin analog set (-9.66 kcal/mol), placing two of its naphthyl rings over a surface formed  
252 by Pro81 and the adjacent  $\beta$ -strand of both HU protomers at the center of the dimer interface  
253 (**Fig. 4A**). Sur-1 is composed of three sulfo-naphthyl rings (**Fig. 4B**), with both terminal rings  
254 substituted with two sulfonyl groups, and a single sulfonate on the central ring. The majority of  
255 these groups are coordinated by multiple Arg residues, including Arg53, Arg55 and Arg80 from  
256 both protomers, and Arg58 and Lys 86 from a single protomer (**Fig. 4A**). Lys86 of the second  
257 protomer is also positioned near ( $\sim 4\text{-}6$  Å) the carbonyl and sulfonyl groups of the central and  
258 terminal naphthyl rings, respectively, exemplifying how the dimeric interface may be exploited  
259 by a pseudo-symmetrical suramin analog. Additionally, Sur-1 and other top HU-binding suramin  
260 analogs (Sur-2 and Sur-3; **Table S3**) are all markedly more conformationally rigid than suramin,  
261 due to the diazene linker between the naphthyl rings. Sur-1 has only four rotatable bonds with a  
262 single low energy conformation (**Fig. 4B**), compared to 10 rotatable bonds and 116 low energy  
263 conformations in suramin. The ligand docking process thus identified suramin analogs with both  
264 improved binding affinity to HU (based on docking score) and reduced conformational rigidity

265 and net charge. These features make Sur-1 a superior candidate compared to suramin for  
266 developing a more specific inhibitor of HU.

267 Our docking procedure with the heparin analog set also identified Hep-41 as having high  
268 affinity (-10.02 kcal/mol) for the same pocket as Sur-1 in the DNA binding cleft of HU (**Fig.**  
269 **4C**). Hep-41 is composed of sulfated iduronic acid and glucosamine with trioxidanylsulfanyl

270

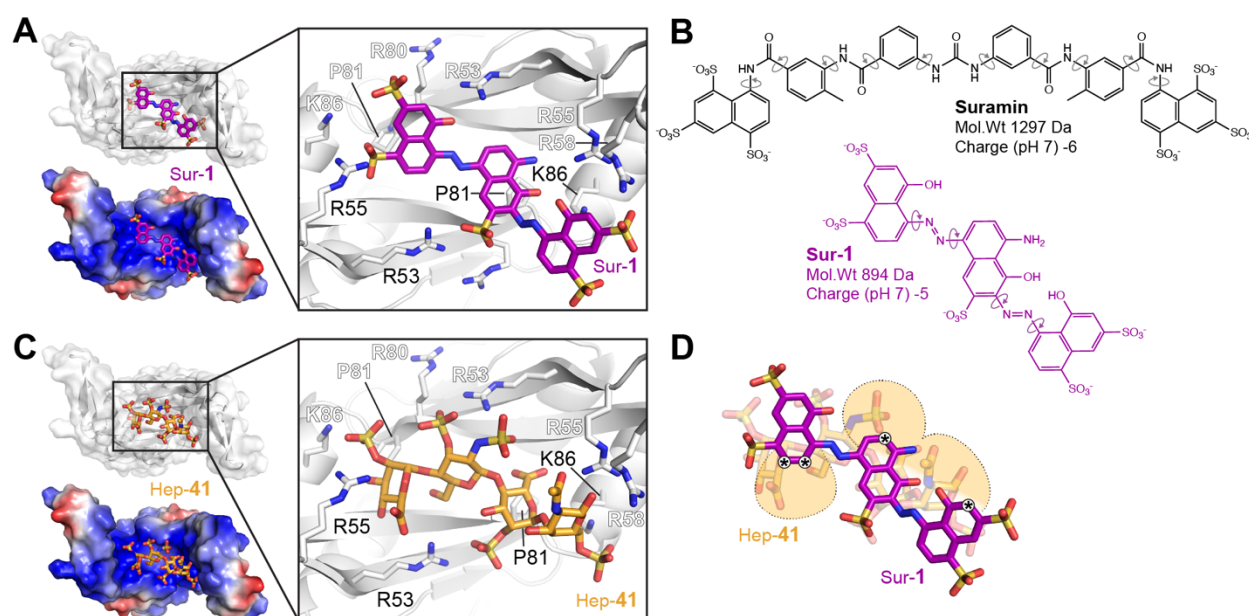

271

272 **Figure 4. Docking-guided elaboration of the top identified suramin analog against HU. A,**  
273 **SP Glide docking pose of suramin analog Sur-1 (purple) bound to the DNA interaction surface of**  
274 **HU (top, white surface; bottom, electrostatic potential surface). B, Comparison of the chemical**  
275 **structures of suramin and Sur-1, highlighting the reduced number of rotatable bonds in the**  
276 **analog. C, SP Glide docking pose of heparin analog Hep-1 (orange) bound to the same surface of**  
277 **HU. D, The overlapping binding poses of Hep-1 and Sur-1 which were used to identify sites in**  
278 **Sur-1 for redesign (indicated \*) to improve binding affinity and specificity.**

279

280 substitution, which make extensive interactions with essentially the same group of residues in  
281 the DNA binding cleft (i.e. Arg53, Arg55 Arg58, Arg80 and Lys86; **Fig. 4B**). However, while

282 docking of Sur-1 and Hep-41 are qualitatively similar, due to its larger number of hydrogen bond  
283 donors/ acceptors, docking of the latter ligand offers detailed structure-guided cues for placement  
284 of new substituents in Sur-1. Specifically, superposition of the two analogs reveals sites on Sur-1  
285 for optimal geometric placement of additional polar groups to enhance interaction within the  
286 binding site (**Fig. 4A,D**). For example, addition of polar groups on each naphthyl ring could  
287 increase target-ligand interactions by further engaging Arg53 and Arg55 (from both protomers)  
288 via bifurcated hydrogen bonding. These dual ligand docking comparisons can thus be used as a  
289 guide to improve the design of suramin analogs to increase both their target specificity and  
290 binding affinity.

291 This same strategy was used for the other eight target proteins, with heparin analog  
292 superposition identifying multiple sites in each top suramin analog where substitutions could be  
293 made to improve affinity and target selectivity (marked \* in **Fig. S2-S5**; also see Supplemental  
294 Results for further details). Specifically, we identified sites for targeted redesign of Sur-6 (using  
295 Hep-42) for binding to the positively charged cleft of TsnR in an extended conformation (**Fig. S2**  
296 **A-D**), and Sur-13 (using Hep-45) and Sur-15 (using Hep-50) for binding with higher affinity and  
297 specificity to Fis (**Fig. S2 E-H**) and RecA (**Fig. S3 A-D**), respectively. Among the viral proteins,  
298 HIV gp120 (6IEQ) binds to smaller analogs than the other targets with the highest docking score  
299 to Sur-22 and sites for targeted redesign identified by docking of Hep-51 (**Fig. S3E-H**).  
300 Similarly, for norovirus RdRp (**Fig. S4A-D**) and bunyavirus nucleocapsid (**Fig. S4E, F**) the  
301 docking identified Sur-24/ Hep-56 and Sur-27/ Hep-52 binding poses, respectively, for targeted  
302 redesign. Corresponding results for SARS-CoV-2 RdRp and nucleocapsid are described in the  
303 next section along with subsequent redesign and further docking analyses. In summary, virtual  
304 screening and precision docking analyses using suramin and heparin analog chemical space has



305 discovered new lead analogs and a path to rational redesign for specific viral and bacterial  
306 protein targets.

307

308 **Suramin analog redesign for specific, high-affinity lead inhibitors of SARS-CoV-2 RdRp**  
309 **and nucleocapsid**

310 SARS-CoV-2 RdRp is a large macromolecular complex composed of nsp12 catalytic subunit,  
311 with an RNA binding tunnel that presents a potential site for drug targeting (**Fig. S5A,B**), and  
312 nsp7-nsp8 cofactors<sup>37</sup>. Virtual screening and docking analyses identified Sur-36 as binding with  
313 highest docking score to SARS-CoV-2 RdRp, with Hep-58 also binding in the same region (**Fig.**  
314 **S5C**). Sur-36 has a central biphenyl ring attached to terminal sulfo-naphthyl groups joined by a  
315 conformationally restricted diazene linker (**Fig. 5B**). Two other similarly high-scoring ligands,  
316 Sur-37 and Sur-38, were also identified (**Table S3**), but Sur-36 was selected as the lead  
317 candidate due to the greater flexibility of these additional hits. Inspection of the RdRp binding  
318 pocket reveals that each ring of Sur-36 is stabilized by multiple interactions: the distal sulfo-  
319 naphthyl ring with Lys551, Ser549 and Arg553, the central phenyl rings with Ile548 and Ala549,  
320 and the proximal sulfo-naphthyl ring with Tyr546 and Asn497 (**Fig. 5A, B**).

321 Using the Hep-58 binding pose, four positions for additional substitutions in Sur-36 were  
322 identified (**Fig. S5D**), as described above for the other ligand/ protein target pairs. A process of  
323 chemical enumeration, structure-guided design and iterative docking was then used to  
324 systematically alter the functional groups of substituents at the identified attachment positions  
325 and calculate the changes in the docking score (**Table S5**). The methoxy groups in the central  
326 phenyl rings were first modified to carboxylate, phenyl-methanol, halides and other functional  
327 groups, with docking analysis identifying the carboxylate groups (Sur-60; **Fig. S6A**) as

328 conferring the greatest increase in docking score, from -10.14 (Sur-36) to -11.24 kcal/mol (Sur-  
329 60). In Sur-60, one phenyl ring carboxyl group engages Lys545, while the second carboxylate  
330 makes new contacts with Arg555. Additional docking-guided modifications were then made in  
331 Sur-60 by systematically testing additional functional groups in the terminal naphthyl rings and  
332 the linker between the central phenyl rings. This optimization process resulted in substitution of  
333 one terminal naphthyl group with a phenalene group, addition of a hydroxyl group to the  
334 remaining sulfo-naphthyl group, and a carbonyl linker between the central rings to generate Sur-  
335 84 (-11.60 kcal/mol; **Fig. S6A**). Sur-84 makes additional contacts to His439 and Arg836 via one  
336 of the carboxylate groups and a hydrophobic interaction between the phenalene group and  
337 Val557. Finally, conversion of a central phenyl ring to naphthyl added hydrophobic contact with  
338 Tyr546 and generated Sur-85 (-11.96 kcal/mol; **Fig. 5C and S6A**).

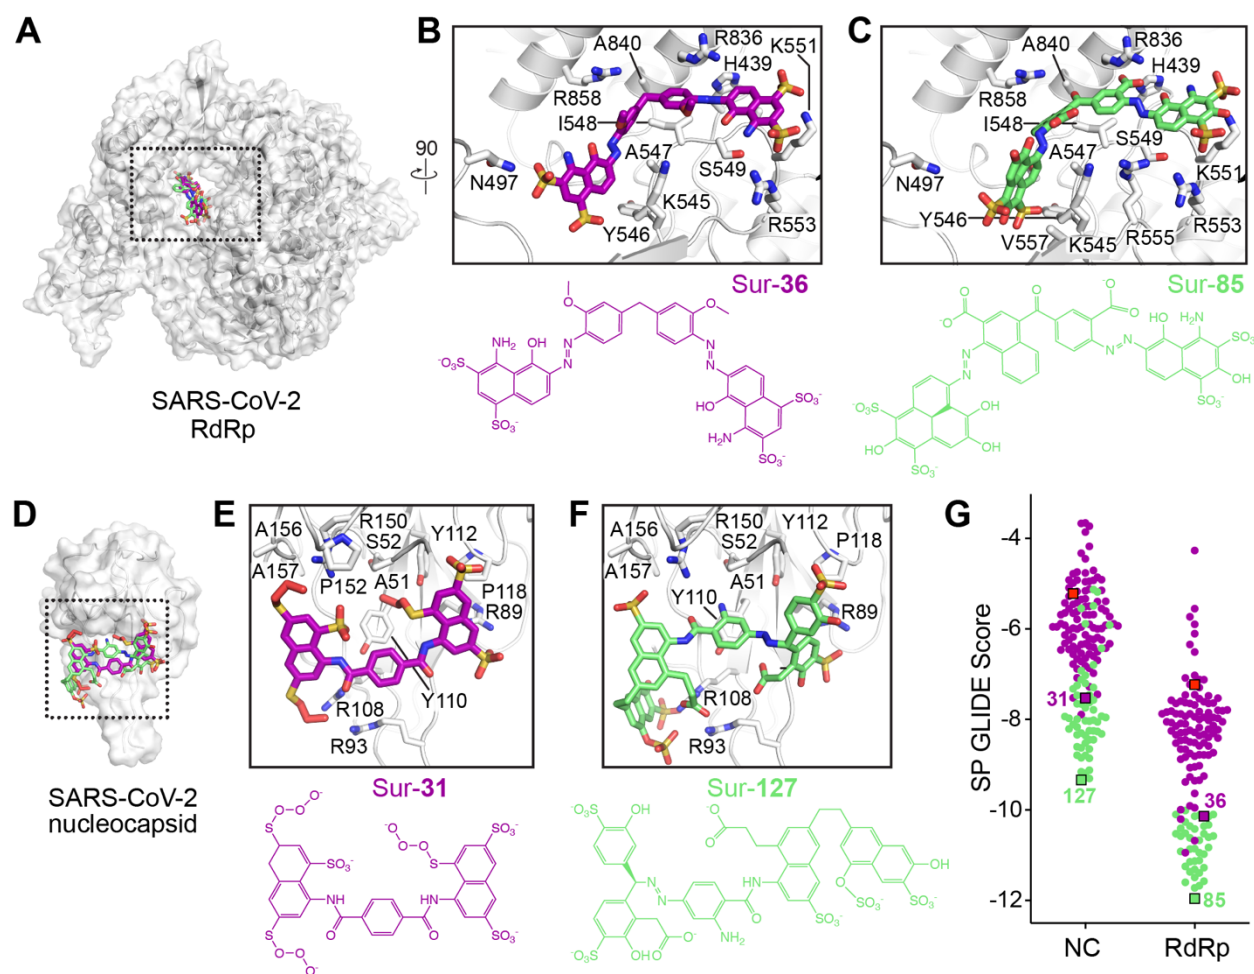

339

340 **Figure 5. Design of suramin analogs specific to SARS-CoV-2 RdRp and nucleocapsid. A,**  
 341 **Location of suramin analogs Sur-36 and Sur-85 in the RNA binding tunnel of SARS-CoV-2**  
 342 **RdRp. B, Zoomed in views of the boxed region in panel A of the SP Glide docking pose of Sur-**  
 343 **36, an existing analog of suramin, bound to the RNA binding tunnel. C, Iterative rounds of**  
 344 **chemical enumeration (Figure S6) and docking, resulted in the designed suramin analog Sur-**  
 345 **85 shown in the same binding pocket. D, Location of suramin analogs Sur-31 and Sur-127 on the**  
 346 **RNA binding surface of SARS-CoV-2 nucleocapsid. E, F, Zoomed in views of the boxed region**  
 347 **in panel D of the SP Glide docking poses of Sur-31 and Sur-127, respectively. G, Comparison of**  
 348 **SP Glide docking scores for the initial top 100 suramin analogs (purple) and analogs tested**  
 349 **during the iterative chemical enumeration process (green), showing the improvement in**  
 350 **predicted affinity. Suramin (red square), starting analogs (Sur-31 and Sur-36 for nucleocapsid**  
 351 **(NC) and RdRp, respectively) and final redesigned analogs (Sur-127 and Sur-85) are highlighted.**

352

353           The same process was also applied to the SARS-CoV-2 nucleocapsid RNA binding  
354 domain<sup>29</sup> which has a shallow positively charged surface (**Fig. S5E-G**). Smaller suramin analogs  
355 with phenyl, stilbene and naphthyl moieties typically docked with higher scores than longer  
356 suramin analogs, with Sur-31 among the highest docking scores (-7.53 kcal/mol) and selected for  
357 further redesign to improve its affinity. Sur-31 is composed of two terminal naphthyl groups with  
358 a central unsubstituted phenyl ring linked connected by two conformationally restricted amide  
359 linkers (**Fig. S5H**). Inspection of the RNA binding pocket reveals Sur-31 is stabilized by  
360 multiple interactions: one sulfo-naphthyl ring with Arg93, Arg108 and Arg150, the central  
361 phenyl rings with Tyr110 and Tyr112, and the second sulfo-naphthyl ring with Tyr112, Thr92  
362 and Arg89 (**Fig. 5D, E**). Our heparin screen also identified Hep-59 as binding to the same region,  
363 revealing potential for extending the Sur-31 scaffold at several sites (indicated \* in **Fig. S5H**).  
364 Again, using docking-guided elaboration, one naphthyl ring was replaced by two sulfonyl-  
365 substituted phenyl rings connected to the central phenyl ring via a conformationally restricted  
366 azide linker resulting in Sur-114 with an improved of docking score of -8.79 kcal/mol (**Fig.**  
367 **S6B**). Sur-114 makes additional interactions with backbone carbonyls of Ala157 and Ile158,  
368 along with an increased van der Waals interaction with the protein. Further guided substitutions  
369 in the second naphthyl ring, adding another disulfonyl-hydroxy naphthyl ring linked by a flexible  
370 linker, generated Sur-121 with a further improvement in docking score to -9.30 kcal/mol (**Fig.**  
371 **S6B**). Final optimization of this naphthyl ring with a sulfate group resulted in Sur-127, with a  
372 final docking score of -9.34 kcal/mol. Sur-127 engages the overall same set of residues but with  
373 increased H-bonding and electrostatic interactions compared to Sur-31 (**Fig. 5F and S6B**).

374 This process thus identified an initial suramin analog for both SARS-CoV-2 protein  
375 targets, RdRp (Sur-36) and nucleocapsid (Sur-31), for which predicted affinity could be  
376 substantially improved by heparin docking-guided redesign efforts, resulting in final analogs  
377 Sur-85 and Sur-127, respectively. Overall, heparin docking- and structure-guided redesign of  
378 suramin analogs resulted in a collection of potential leads with markedly improved docking  
379 scores and other properties, compared to analogs identified in precision docking (compare green  
380 and purple scores, respectively in **Fig. 5G**).

381 We next investigated protein residue conservation to gain insights into the evolutionary  
382 constraints on the potential inhibitor binding sites in SARS-CoV-2 RdRp and nucleocapsid  
383 proteins. Across all coronaviruses the identified binding sites appear moderately and very highly  
384 conserved in nucleocapsid and RdRp, respectively (**Fig. 6**). As such, the phylogenetic  
385 relationship reveals the high similarity of both SARS-CoV-2 proteins to homologs in other  $\beta$ -  
386 coronavirus family members, comprising predominantly bat-origin viruses such as MERS-CoV  
387 and HCoV-HKU1 (**Fig. 6A, B; Fig S7**). The conservation of the RdRp binding site also extends  
388 to  $\alpha$ -coronavirus family members of bat origin, which originated the human pathogens HCoV-  
389 229E and HCoV-NL63 (**Fig. 6A, B**). More broadly, the generally strong conservation in each  
390 binding site implies that the designed suramin analogs, Sur-85 and Sur-127, would potentially be  
391 equally effective in targeting these proteins in different coronaviruses. Thus, together the ligand  
392 docking/ elaboration strategies and evolutionary analyses provide a basis for designing specific  
393 inhibitors with broad anti-coronaviral activity.

394

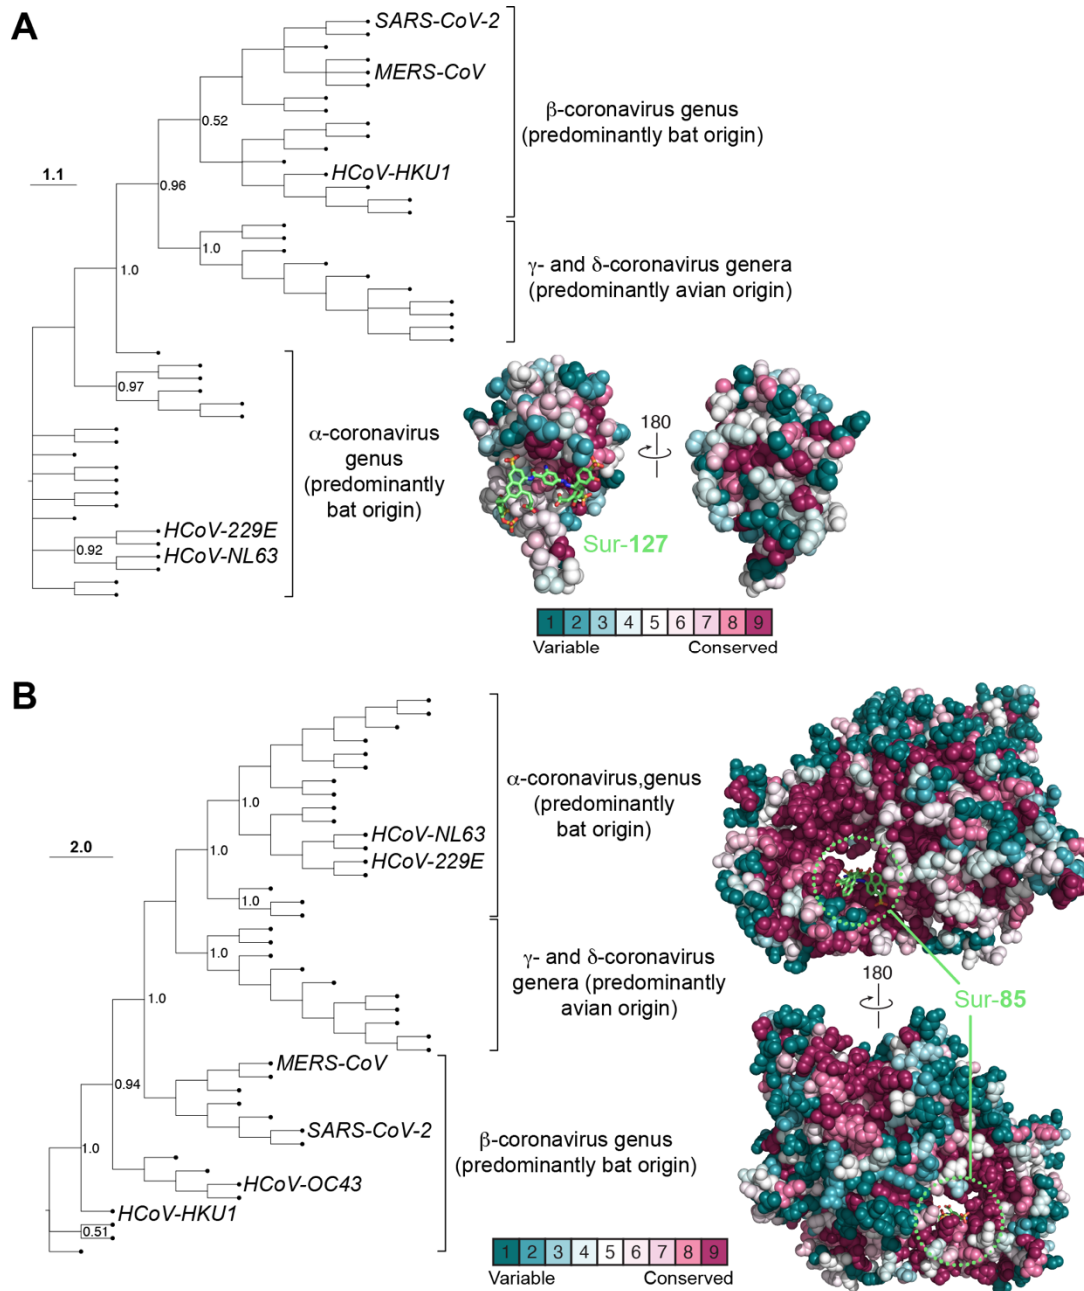

395

396 **Figure 6. Maximum likelihood phylogenetic tree of coronavirus RdRp and nucleocapsid. A,**

397 Phylogenetic tree of coronavirus capsid protein showing a separate clade for the  $\beta$ -coronavirus

398 genus, with SARS-CoV-2 and MERS-CoV, which are mostly of bat origin. This clade is closely

399 related to  $\gamma$  coronaviruses of avian origin while another bat origin  $\alpha$ -coronavirus family forms a

400 separate clade. Conservation of residues in coronavirus capsid proteins shows the binding pocket

401 targeted by the designed suramin analog Sur-127 is evolutionarily conserved. *B*, As *panel A* but

402 for SARS-CoV-2 RdRp and Sur-85.

403

#### 404 **Correlation of SP Glide docking and MM-GBSA rescoring for known suramin analogs**

405 Computational pipelines for discovery of new compounds, such as the one described herein, rely on fast  
406 methods such as simple docking scoring functions for initial screening of large chemical libraries on a  
407 reasonable timescale. Among these approaches, the level of precision (e.g., HTVS vs SP Glide) also  
408 dictate the speed of docking calculations and thus our choice of initial HTVS followed by SP Glide  
409 rescoring (**Fig. 2** and **Fig. 3E,F**). However, even compound rankings from the more accurate SP Glide  
410 docking may fail to correlate with experimental activity or binding studies due to contributions of  
411 (unmodeled) waters, ions and other biological factors, as well as inherent flexibility of the protein target  
412 binding site in addition to ligand flexibility. More sophisticated approaches, such as free energy  
413 perturbation (FEP) or thermodynamic integration methods, can be applied at later stages of lead  
414 optimization, but are comparatively computationally expensive and thus not readily applicable for initial  
415 screening of large libraries. MM-GBSA is an alternate force field-based method which offers relatively  
416 quick binding free energy calculations<sup>38</sup> and could be applied to rescoring ligand docking at one of  
417 several stages in our workflow.

418 To assess the utility of incorporating MM-GBSA calculations, we first used experimental data for  
419 suramin analogs targeted to SARS-CoV-2 RdRp, which were published during the course of this work<sup>21</sup>.  
420 First, SP Glide docking and MM-GBSA calculations were performed for suramin and five of the reported  
421 compounds<sup>21</sup> and both methods showed good correlation with observed activity, particularly for MM-  
422 GBSA ( $R^2$  0.63 for SP Glide and 0.90 for MM-GBSA; (**Fig. 7A, B**). The top published suramin analog for  
423 SARS-CoV-2 RdRp (NF157) with a reported  $IC_{50}$  of 0.041  $\mu$ M yielded a MM-GBSA score of -69.7  
424 kcal/mol. We next calculated MM-GBSA scores for the suramin analogs from our targeted re-design  
425 approach, and plotted these values to estimate their potential inhibitory activity. Many of our designed  
426 compounds show high MM-GBSA scores ( $< -50$  kcal/mol) with potentially better than 0.3  $\mu$ M predicted  
427  $IC_{50}$ . In particular, our re-design strategy based on Sur-36 (Sur-60, Sur-84 and Sur-85, shown as green

428 points in **Fig. 7B**) result in a final compound with predicted  $IC_{50}$  that improves on the best currently  
429 reported and experimentally tested analog.

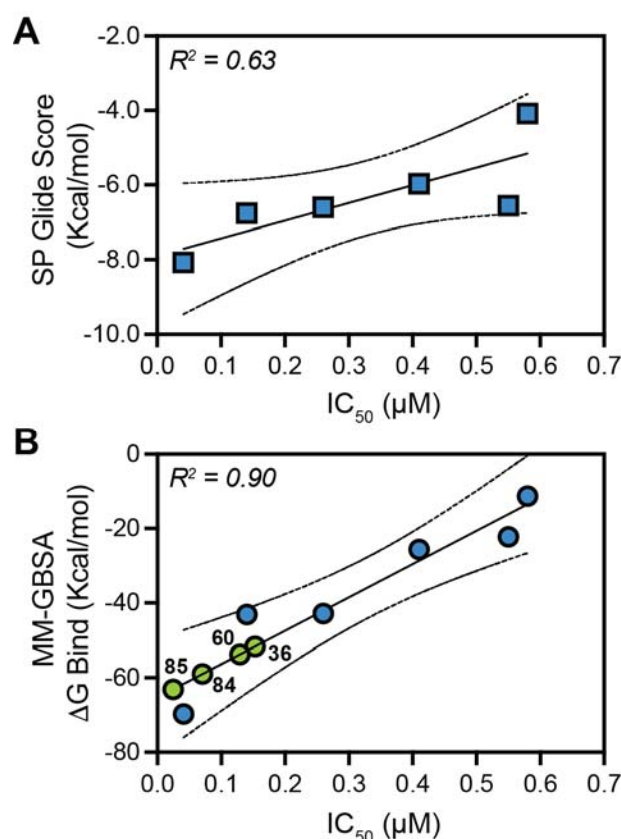

430  
431 **Figure 7. Correlation of suramin analog SP Glide docking and MM-GBSA rescoring for**  
432 **SARS-CoV-2 RdRp.** Correlation between **A**, SP Glide scores or **B**, MM-GBSA with reported  $IC_{50}$  data<sup>21</sup>  
433 for suramin and analogs with activity against SARS-CoV-2. The respective correlation coefficients ( $R^2$   
434 values) for the linear fit to the data are shown on each plot. Values (labeled green points in *panel B*) for  
435 new suramin analogs designed based on Sur-36 (Sur-60, Sur-84 and Sur-85) are plotted using the linear  
436 fit to predict their potential activity.

437 Our additional protein targets for suramin analog re-design do not currently have experimental  
438 activity data for similar comparisons, so we therefore used three additional available datasets for suramin  
439 analogs with experimental binding or activity data for other protein targets. Suramin analogs have been  
440 reported that are capable of inhibiting the minichromosome maintenance protein 10 (Mcm10)<sup>39</sup>, an



441 essential factor for DNA unwinding and a promising drug for anti-cancer therapy. Human Mcm10 was  
442 homology modeled based on *Xenopus* Mcm10 (PDB 3EBE) to allow SP Glide docking scores and MM-  
443 GBSA calculations for this system. Again, both approaches gave good correlation with experimentally  
444 determined binding affinities ( $K_d$  values), with SP-Glide performing marginally better (line fit  $R^2 = 0.72$   
445 and 0.79 for MM-GBSA and SP Glide, respectively; **Fig. S8A**). Next, we used SIRT1, for which suramin  
446 analogs with inhibitory activity have been reported<sup>23</sup>, modeling the dimer interface using the SIRT5-  
447 suramin complex and SIRT1 crystal structures (PDB 2NYR and 4I5I, respectively). Our rescoring  
448 analysis reveals good correlation ( $R^2 = 0.88$ ) with MM-GBSA, but essentially no correlation with SP  
449 Glide score (**Fig. S8B**). Similarly, heparanase inhibitors which have potential use in inflammatory  
450 diseases, were reported based on suramin scaffold<sup>40</sup>. Our analysis (**Fig. S8C**) again showed no correlation  
451 between SP Glide and measured activity, whereas MM-GBSA was highly predictive ( $R^2 = 0.92$ ) of  $IC_{50}$ ,  
452 except for a small group of ligands (red points in **Fig. S8C**). We speculate that these outliers are a result  
453 of differential effect of those ligands on the target; for example, optimal binding of these ligands might  
454 exploit protein side chain flexibility of beyond the 5 Å radius of our calculations, or some other critical  
455 features such as hydration or bound ion.

456

## 457 DISCUSSION

458 Suramin has garnered wide clinical interest for treating parasitic infections, as well as diseases  
459 ranging from viral infections (e.g. HIV, Dengue and Ebola) to human cancers<sup>12</sup>. Despite not  
460 satisfying typical drug likeliness criteria, such as Lipinski's "rule of five", suramin and its  
461 analogs have found success in clinical application. Suramin is negatively charged and binds  
462 predominantly positively charged surfaces in proteins involved in DNA and RNA processing,  
463 e.g., DNA and RNA polymerases, telomerase and chromodomain proteins, histone  
464 methyltransferases, and sirtuin histone deacetylases<sup>19, 21, 23, 27</sup>. Suramin also inhibits several

465 membrane channels and signaling proteins. Despite suramin having been used for more than 100  
466 years and shown to inhibit diverse protein families, there still exists a significant gap in our  
467 understanding of its promiscuous antagonist properties which likely also underpin its off-target  
468 and side effects in clinical use.

469         Prior to the current work, the nature of preferred binding surfaces and molecular  
470 determinants of suramin promiscuity were unclear. We reasoned that understanding these  
471 features could facilitate structure-based design of new suramin analogs with increased target  
472 specificity. Collectively, our analyses of available structures with suramin or suramin analogs  
473 revealed the contributions of both the physicochemical nature of the target protein binding  
474 pocket and conformational properties of suramin in making it a promiscuous ligand for diverse  
475 protein targets. In particular, suramin's high flexibility, conferred by ten rotatable bonds, largely  
476 unsubstituted phenyl groups, and numerous non-directional electrostatic interactions with  
477 positively charged residues, collectively contribute to an ability to bind to structurally diverse  
478 nucleic acid interaction surfaces. Additionally, our analyses revealed an enrichment of aromatic  
479 residues in favored suramin binding sites and the role of various types of  $\pi$ -mediated  
480 interactions.

481         To date, suramin has been used as a lead in only a limited number of SAR studies. In one  
482 case, suramin-derived fragments were designed, synthesized and modified to act as an antagonist  
483 of the G protein-coupled receptor  $P_2Y_2$  (ref.<sup>41</sup>), which mediates microglial inflammation. In  
484 another study, the toluene ring in suramin was substituted to improve suramin's binding to  
485 falcipain-2 (ref.<sup>42</sup>), a cysteine protease of the malaria parasite *Plasmodium falciparum*. Although  
486 both these experimental studies used suramin as a lead, to our knowledge no high-throughput  
487 virtual screening has been performed nor a structure-guided approach taken to improve the

488 affinity and selectivity of suramin based inhibitors. Here, we devised a virtual screening and  
489 precision docking strategy using sets of suramin and heparin analogs, the latter of which were  
490 then used to guide the redesign of top suramin analogs for enhanced target affinity and  
491 specificity. This redesign strategy was fully exemplified using SARS-CoV-2 nucleocapsid and  
492 RdRp proteins in a proof-of-concept redesign of suramin analogs as specific inhibitors of these  
493 viral proteins with potentially broad anti-coronaviral activity.

494 Suramin has been explored for its inhibitory activity against both bacterial and viral  
495 pathogens. Here, we demonstrated the potential utility of our virtual screening and ligand  
496 docking enabled identification and redesign of suramin analogs to improve their affinity and  
497 specificity for both known (RecA and HU) and new antibacterial targets (Fis and TsnR). For  
498 example, our study produced suramin analogs which bind more tightly to HU, based on  
499 computational docking scores, than those previously identified by screening inhibitors of HU<sup>33</sup>.  
500 Similarly, our computational strategy generated docking models for suramin and its analogs that  
501 can explain their previously identified capacity to block the function of diverse viral proteins  
502 including HIV-1 gp120, norovirus RdRp and bunyavirus nucleocapsid.

503 SARS-CoV-2 has also been shown to be inhibited by suramin<sup>7</sup> and, during preparation of  
504 this manuscript, cryo-EM structural analysis and biochemical evidence revealed the molecular  
505 basis of suramin binding to SARS-CoV-2 RdRp<sup>21</sup>. Our docking study is consistent with these  
506 structural insights in which multiple binding poses of suramin were found in the RNA binding  
507 channel, one blocking the RNA template strand and the other binding to the primer strand in the  
508 catalytic site. Suramin and its analogs have been shown to be 20-fold more potent than  
509 remdesivir binding to the same site, and our results suggest that further improvement in suramin  
510 analog design is possible. Specifically, our docking-guided elaboration of suramin analogs

511 showed improvement in the drug scaffold to make it a tighter binder based on both SP Glide  
512 docking and MM-GBSA rescoring calibrated using the experimentally determined binding  
513 data<sup>21</sup>. Using additional published datasets for suramin analogs with experimental binding or  
514 activity data for other protein targets, we also showed that MM-GBSA calculations consistently  
515 correlate well with experimental data. These studies thus suggest that incorporation of MM-  
516 GBSA at some stage of our computational pipeline (e.g., either prior to, or during lead analog re-  
517 design; **Fig. 2C**), can at a minimum enhance confidence in a ligand set identified by SP Glide,  
518 while for other targets its use may be essential. We speculate that the flexibility of the target,  
519 which is better modeled in MM-GBSA as compared to SP Glide scores, can be essential for  
520 success with some targets. However, initial selection of lead compounds from large libraries, can  
521 still reliably use much faster HTVS and SP Glide scoring, followed by MM-GBSA (or other  
522 more sophisticated approaches) to support later stages of lead optimization.

523 Our studies also identified the potential to target SARS-CoV-2 nucleocapsid with  
524 suramin analogs and proposed analogs possessing enhanced affinity and specificity. This  
525 approach could also be applied to the 3CL protease which was recently identified as another  
526 possible suramin binding target<sup>43</sup>. Our phylogenetic and evolutionary analyses also suggest that  
527 the suramin binding pockets are evolutionary conserved in related coronavirus RdRp and  
528 nucleocapsid proteins which could make these suramin analogs more broadly applicable  
529 therapeutics against this group of viral pathogens.

530 In summary, this study has defined the basis of suramin promiscuity and the nature of its  
531 preferred protein target binding sites and established a computational pipeline (**Fig. 2**) to rapidly  
532 identify new suramin analogs targeting diverse viral and bacterial targets for novel antimicrobial  
533 development. Suramin analogs screened in this study (e.g. Sur-8, Sur-23, Sur-25 and Sur-33) are

534 built from modular aromatic fragments which can be decorated with different polar or charged  
535 substitutions and connected by various linkers (e.g. amide, sulfonamide and diazene; **Fig S9**).  
536 These properties can be readily exploited for future fragment-based designs of suramin-like  
537 inhibitors of viral and bacterial nucleic acid binding proteins. As such, our strategy offers the  
538 possibility for expedient design of novel suramin analogs with improved properties and efficacy  
539 for synthesis and experimental confirmation of their potential as novel lead antimicrobials.

540

## 541 **METHODS**

### 542 **Virtual screening, docking and conformational analysis**

543 Suramin and heparin analog sets were created using chemoinformatic guided searches in  
544 PubChem with parameters: Tanimoto similarity of >90%, <40 rotatable bonds, and molecular  
545 weight < 2 kD. The structures of compounds retrieved were processed with the LigPrep module  
546 in Schrödinger Software. For conformational analysis of the ligands, the ConfGen module<sup>44</sup> of  
547 Schrödinger Software was used with the “mix torsional low mode sampling” method, which is a  
548 combination of *Monte Carlo* and systematic sampling of rotatable bonds to find low energy  
549 ligand conformations.

550 To prepare each protein (“receptor”) for ligand docking, hydrogen atoms were added, and  
551 the structure energy minimized using the Protein Preparation Wizard in Schrödinger Software.  
552 The docking grid location was determined by analysis of the nucleic acid binding region of each  
553 protein, either by prediction using SiteMap (Schrödinger Software) or from published  
554 experimental evidence for a given target protein. Docking grid size was determined based on the  
555 nucleic acid binding pocket volume and designed to completely cover all residues and centered  
556 symmetrically. Docking was performed using the virtual screening workflow of Glide<sup>45</sup> in

557 Schrödinger Software, in HTVS mode and then for precision docking in SP mode as used in our  
558 previous studies<sup>33, 46</sup>. MM-GBSA calculations were performed in the Prime module of  
559 Schrödinger Software with the OPLS3e force field and allowing protein side chain flexibility  
560 within a 5 Å radius of the bound ligand.

561 Ligand physicochemical properties and chemical similarity were calculated in the Canvas  
562 module of Schrödinger Software<sup>47</sup>. Ligand-protein nonbonded interactions were calculated  
563 using BIOVIA DS Viewer for salt bridges, hydrogen bonds and other  $\pi$  mediated interactions.  
564 PyMOL was used for the visual inspection of structures and generation of figures.

565

#### 566 **Phylogenetic analysis and conservation study**

567 Homologous sequences of coronavirus RdRp and nucleocapsid were collected by BLAST search  
568 in NCBI with ~10,000 and 5,000 sequences identified, respectively. The large number of  
569 sequences arises due to the number of sequenced SARS-CoV-2 and related viruses that have  
570 >99% identity in the dataset. Therefore, the CD-HIT server<sup>48</sup> was next used to remove redundant  
571 sequences from the dataset using a sequence identity cut-off of 98%. Multiple sequence  
572 alignment and evolutionary analyses were then performed using Clustal Omega and MEGA 7  
573 (ref.<sup>49</sup>), respectively, with evolutionary history inferred using the Maximum Likelihood method  
574 with bootstrap consensus tree inferred from 100 replicates. The fraction of replicate trees in  
575 which the associated taxa clustered together in the bootstrap test (100 replicates) are shown next  
576 to the branches. Evolutionary distances were computed using the JTT matrix-based method and  
577 are in the units of number of amino acid substitutions per site. The rate variation among sites was  
578 modeled with a gamma distribution (shape parameter 4). Finally, the phylogenetic tree was  
579 visualized using FigTree (<http://tree.bio.ed.ac.uk/software/figtree/>). Conserved residues were

**580** plotted on the SARS-CoV-2 RdRp (PDB 7BV1, chain A) and nucleocapsid (PDB 6M3M, chain  
**581** A) using ConSurf<sup>50</sup> from the pre-calculated multiple sequence alignment.

**582**

## ASSOCIATED CONTENT

### Supplementary Results

Precision docking of suramin and heparin analogs to bacterial and viral protein targets.

### Supplementary Figures

**Figure S1.** Structural basis of viral protein inhibition by suramin.

**Figure S2.** Docking-guided elaboration of top suramin analogs against TsnR and Fis.

**Figure S3.** Docking-guided elaboration of top suramin analogs against RecA and HIV gp120.

**Figure S4.** Docking-guided elaboration of top suramin analogs against norovirus RdRp and bunyavirus nucleocapsid.

**Figure S5.** Docking-guided elaboration of top suramin analogs against SARS-CoV2 RdRp and nucleocapsid.

**Figure S6.** Suramin analog redesign using iterative chemical enumeration and docking.

**Figure S7.** Phylogenetic analysis of coronavirus RdRp and nucleocapsid.

**Figure S8.** Correlation of SP Glide docking and MM-GBSA rescoring for known suramin analogs

**Figure S9.** Building blocks of suramin analogs.

### Supplementary Tables

**Table S1.** Protein crystal structures with bound suramin and suramin analogs.

**Table S2.** Ligands used as database search query for suramin and heparin analogs.

**Table S3.** Glide SP docking score of suramin analogs to bacterial and viral targets.

**Table S4.** Glide SP docking score of heparin analogs to bacterial and viral targets.



**Table S5.** Glide SP docking score of computationally designed suramin analogs based on Sur-31 and Sur-37 against SARS-CoV-2 RdRp and nucleocapsid

### **Additional Supplementary Files**

Dey-JCIM-Supplementary File-Top 100 Ligands SP Glide Docking.xlsx

Dey-JCIM-Supplementary File-SMILES.csv

Atomic coordinates of protein targets with suramin or heparin analogs from ligand docking studies. Files are named by target and ligand using the naming convention described in the main text, e.g. *HU-Sur1.pdb*.

### **Data and Software Availability**

Additional underlying data from these studies beyond those provided in the Supplementary Materials will be made available on request by the authors.

### **AUTHOR INFORMATION**

#### **Corresponding Author**

Debayan Dey, email: [debayan.dey@emory.edu](mailto:debayan.dey@emory.edu) or Graeme L. Conn, email: [gconn@emory.edu](mailto:gconn@emory.edu)

#### **Author Contributions**

DD, SR and GLC conceptualized the project. DD and GLC wrote the draft. All authors have given approval to the final version of the manuscript.

## Funding Sources

None

## ACKNOWLEDGEMENT

We thank Dr. William Wuest for comments on the manuscript and members of the Conn lab for discussions and comment through the course of this work.

## REFERENCES

1. Guy, R. K.; DiPaola, R. S.; Romanelli, F.; Dutch, R. E., Rapid Repurposing of Drugs for COVID-19. *Science* **2020**, *368* (6493), 829-830.
2. Choy, K. T.; Wong, A. Y.; Kaewpreedee, P.; Sia, S. F.; Chen, D.; Hui, K. P. Y.; Chu, D. K. W.; Chan, M. C. W.; Cheung, P. P.; Huang, X.; Peiris, M.; Yen, H. L., Remdesivir, Lopinavir, Emetine, and Homoharringtonine Inhibit SARS-Cov-2 Replication in Vitro. *Antiviral Res* **2020**, *178*, 104786.
3. Costanzo, M.; De Giglio, M. A. R.; Roviello, G. N., SARS-Cov-2: Recent Reports on Antiviral Therapies Based on Lopinavir/Ritonavir, Darunavir/Umifenovir, Hydroxychloroquine, Remdesivir, Favipiravir and Other Drugs for the Treatment of the New Coronavirus. *Curr Med Chem* **2020**, *27* (27), 4536-4541.
4. Abraham, S. M.; Lawrence, T.; Kleiman, A.; Warden, P.; Medghalchi, M.; Tuckermann, J.; Saklatvala, J.; Clark, A. R., Antiinflammatory Effects of Dexamethasone Are Partly Dependent on Induction of Dual Specificity Phosphatase 1. *J Exp Med* **2006**, *203* (8), 1883-1889.
5. Solinas, C.; Perra, L.; Aiello, M.; Migliori, E.; Petrosillo, N., A Critical Evaluation of Glucocorticoids in the Management of Severe COVID-19. *Cytokine Growth Factor Rev* **2020**, *54*, 8-23.

6. Heidary, F.; Gharebaghi, R., Ivermectin: A Systematic Review from Antiviral Effects to COVID-19 Complementary Regimen. *J Antibiot (Tokyo)* **2020**, *73(9)*, 593-602.
7. da Silva, C. S. B.; Thaler, M.; Tas, A.; Ogando, N. S.; Bredenbeek, P. J.; Ninaber, D. K.; Wang, Y.; Hiemstra, P. S.; Snijder, E. J.; van Hemert, M. J., Suramin Inhibits SARS-Cov-2 Infection in Cell Culture by Interfering with Early Steps of the Replication Cycle. *Antimicrob Agents Chemother* **2020**, *64(8)*, e00900-00920.
8. Brun, R.; Blum, J.; Chappuis, F.; Burri, C., Human African Trypanosomiasis. *Lancet* **2010**, *375 (9709)*, 148-159.
9. Hawking, F., Suramin: With Special Reference to Onchocerciasis. *Adv Pharmacol Chemother* **1978**, *15*, 289-322.
10. Morgan, H. P.; McNae, I. W.; Nowicki, M. W.; Zhong, W.; Michels, P. A.; Auld, D. S.; Fothergill-Gilmore, L. A.; Walkinshaw, M. D., The Trypanocidal Drug Suramin and Other Trypan Blue Mimetics Are Inhibitors of Pyruvate Kinases and Bind to the Adenosine Site. *J Biol Chem* **2011**, *286 (36)*, 31232-31240.
11. Fleck, S. L.; Birdsall, B.; Babon, J.; Dluzewski, A. R.; Martin, S. R.; Morgan, W. D.; Angov, E.; Kettleborough, C. A.; Feeney, J.; Blackman, M. J.; Holder, A. A., Suramin and Suramin Analogues Inhibit Merozoite Surface Protein-1 Secondary Processing and Erythrocyte Invasion by the Malaria Parasite Plasmodium Falciparum. *J Biol Chem* **2003**, *278 (48)*, 47670-47677.
12. Wiedemar, N.; Hauser, D. A.; Maser, P., 100 Years of Suramin. *Antimicrob Agents Chemother* **2020**, *64 (3)*, e01168-01119.
13. Fantini, J.; Hammache, D.; Delezay, O.; Yahy, N.; Andre-Barres, C.; Rico-Lattes, I.; Lattes, A., Synthetic Soluble Analogs of Galactosylceramide (Galcer) Bind to the V3 Domain of HIV-1 Gp120 and Inhibit HIV-1-Induced Fusion and Entry. *J Biol Chem* **1997**, *272 (11)*, 7245-7252.
14. Aguilar, J. S.; Rice, M.; Wagner, E. K., The Polysulfonated Compound Suramin Blocks Adsorption and Lateral Diffusion of Herpes Simplex Virus Type-1 in Vero Cells. *Virology* **1999**, *258 (1)*, 141-151.

15. Garson, J. A.; Lubach, D.; Passas, J.; Whitby, K.; Grant, P. R., Suramin Blocks Hepatitis C Binding to Human Hepatoma Cells in Vitro. *J Med Virol* **1999**, *57* (3), 238-242.
16. Chen, Y.; Maguire, T.; Hileman, R. E.; Fromm, J. R.; Esko, J. D.; Linhardt, R. J.; Marks, R. M., Dengue Virus Infectivity Depends on Envelope Protein Binding to Target Cell Heparan Sulfate. *Nat Med* **1997**, *3* (8), 866-871.
17. Ren, P.; Zheng, Y.; Wang, W.; Hong, L.; Delpeyroux, F.; Arenzana-Seisdedos, F.; Altmeyer, R., Suramin Interacts with the Positively Charged Region Surrounding the 5-Fold Axis of the EV-A71 Capsid and Inhibits Multiple Enterovirus A. *Sci Rep* **2017**, *7*, 42902.
18. Albuлесcu, I. C.; Kovacikova, K.; Tas, A.; Snijder, E. J.; van Hemert, M. J., Suramin Inhibits Zika Virus Replication by Interfering with Virus Attachment and Release of Infectious Particles. *Antiviral Res* **2017**, *143*, 230-236.
19. Mastrangelo, E.; Pezzullo, M.; Tarantino, D.; Petazzi, R.; Germani, F.; Kramer, D.; Robel, I.; Rohayem, J.; Bolognesi, M.; Milani, M., Structure-Based Inhibition of Norovirus RNA-Dependent RNA Polymerases. *J Mol Biol* **2012**, *419* (3-4), 198-210.
20. Albuлесcu, I. C.; van Hoolwerff, M.; Wolters, L. A.; Bottaro, E.; Nastruzzi, C.; Yang, S. C.; Tsay, S. C.; Hwu, J. R.; Snijder, E. J.; van Hemert, M. J., Suramin Inhibits Chikungunya Virus Replication through Multiple Mechanisms. *Antiviral Res* **2015**, *121*, 39-46.
21. Yin, W.; Luan, X.; Li, Z.; Zhou, Z.; Wang, Q.; Gao, M.; Wang, X.; Zhou, F.; Shi, J.; You, E.; Liu, M.; Wang, Q.; Jiang, Y.; Jiang, H.; Xiao, G.; Zhang, L.; Yu, X.; Zhang, S.; Eric Xu, H., Structural Basis for Inhibition of the SARS-Cov-2 RNA Polymerase by Suramin. *Nat Struct Mol Biol* **2021**, *28* (3), 319-325.
22. Ullmann, H.; Meis, S.; Hongwiset, D.; Marzian, C.; Wiese, M.; Nickel, P.; Communi, D.; Boeynaems, J. M.; Wolf, C.; Hausmann, R.; Schmalzing, G.; Kassack, M. U., Synthesis and Structure-Activity Relationships of Suramin-Derived P2Y11 Receptor Antagonists with Nanomolar Potency. *J Med Chem* **2005**, *48* (22), 7040-7048.
23. Trapp, J.; Meier, R.; Hongwiset, D.; Kassack, M. U.; Sippl, W.; Jung, M., Structure-Activity Studies on Suramin Analogues as Inhibitors of NAD<sup>+</sup>-Dependent Histone Deacetylases (Sirtuins). *ChemMedChem* **2007**, *2* (10), 1419-1431.

24. Kaina, B., On the Origin of SARS-Cov-2: Did Cell Culture Experiments Lead to Increased Virulence of the Progenitor Virus for Humans? *In Vivo* **2021**, *35* (3), 1313-1326.
25. Murakami, M. T.; Arruda, E. Z.; Melo, P. A.; Martinez, A. B.; Calil-Elias, S.; Tomaz, M. A.; Lomonte, B.; Gutierrez, J. M.; Arni, R. K., Inhibition of Myotoxic Activity of Bothrops Asper Myotoxin Ii by the Anti-Trypanosomal Drug Suramin. *J Mol Biol* **2005**, *350* (3), 416-426.
26. Schuetz, A.; Min, J.; Antoshenko, T.; Wang, C. L.; Allali-Hassani, A.; Dong, A.; Loppnau, P.; Vedadi, M.; Bochkarev, A.; Sternglanz, R.; Plotnikov, A. N., Structural Basis of Inhibition of the Human NAD<sup>+</sup>-Dependent Deacetylase SIRT5 by Suramin. *Structure* **2007**, *15* (3), 377-389.
27. Ren, C.; Morohashi, K.; Plotnikov, A. N.; Jakoncic, J.; Smith, S. G.; Li, J.; Zeng, L.; Rodriguez, Y.; Stojanoff, V.; Walsh, M.; Zhou, M. M., Small-Molecule Modulators of Methyl-Lysine Binding for the CBX7 Chromodomain. *Chem Biol* **2015**, *22* (2), 161-168.
28. Jiao, L.; Ouyang, S.; Liang, M.; Niu, F.; Shaw, N.; Wu, W.; Ding, W.; Jin, C.; Peng, Y.; Zhu, Y.; Zhang, F.; Wang, T.; Li, C.; Zuo, X.; Luan, C. H.; Li, D.; Liu, Z. J., Structure of Severe Fever with Thrombocytopenia Syndrome Virus Nucleocapsid Protein in Complex with Suramin Reveals Therapeutic Potential. *J Virol* **2013**, *87* (12), 6829-6839.
29. Kang, S.; Yang, M.; Hong, Z.; Zhang, L.; Huang, Z.; Chen, X.; He, S.; Zhou, Z.; Zhou, Z.; Chen, Q.; Yan, Y.; Zhang, C.; Shan, H.; Chen, S., Crystal Structure of SARS-Cov-2 Nucleocapsid Protein RNA Binding Domain Reveals Potential Unique Drug Targeting Sites. *Acta Pharm Sin B* **2020**, *10*(7), 1228-1238.
30. Yah, N.; Sabatier, J. M.; Nickel, P.; Mabrouk, K.; Gonzalez-Scarano, F.; Fantini, J., Suramin Inhibits Binding of the V3 Region of HIV-1 Envelope Glycoprotein Gp120 to Galactosylceramide, the Receptor for HIV-1 Gp120 on Human Colon Epithelial Cells. *J Biol Chem* **1994**, *269* (39), 24349-24353.
31. Dillon, S. C.; Dorman, C. J., Bacterial Nucleoid-Associated Proteins, Nucleoid Structure and Gene Expression. *Nat Rev Microbiol* **2010**, *8* (3), 185-195.
32. Stella, S.; Cascio, D.; Johnson, R. C., The Shape of the DNA Minor Groove Directs Binding by the DNA-Bending Protein Fis. *Genes Dev* **2010**, *24* (8), 814-826.

33. Bhowmick, T.; Ghosh, S.; Dixit, K.; Ganesan, V.; Ramagopal, U. A.; Dey, D.; Sarma, S. P.; Ramakumar, S.; Nagaraja, V., Targeting Mycobacterium Tuberculosis Nucleoid-Associated Protein HU with Structure-Based Inhibitors. *Nat Commun* **2014**, *5*, 4124.
34. Dey, D.; Nagaraja, V.; Ramakumar, S., Structural and Evolutionary Analyses Reveal Determinants of DNA Binding Specificities of Nucleoid-Associated Proteins HU and IHF. *Mol Phylogenet Evol* **2017**, *107*, 356-366.
35. Nautiyal, A.; Patil, K. N.; Muniyappa, K., Suramin Is a Potent and Selective Inhibitor of Mycobacterium Tuberculosis RecA Protein and the SOS Response: RecA as a Potential Target for Antibacterial Drug Discovery. *J Antimicrob Chemother* **2014**, *69* (7), 1834-1843.
36. Dunstan, M. S.; Hang, P. C.; Zelinskaya, N. V.; Honek, J. F.; Conn, G. L., Structure of the Thiostrepton Resistance Methyltransferase.S-Adenosyl-L-Methionine Complex and Its Interaction with Ribosomal RNA. *J Biol Chem* **2009**, *284* (25), 17013-17020.
37. Peng, Q.; Peng, R.; Yuan, B.; Zhao, J.; Wang, M.; Wang, X.; Wang, Q.; Sun, Y.; Fan, Z.; Qi, J.; Gao, G. F.; Shi, Y., Structural and Biochemical Characterization of the Nsp12-Nsp7-Nsp8 Core Polymerase Complex from SARS-Cov-2. *Cell Rep* **2020**, *31* (11), 107774.
38. Beveridge, D. L.; DiCapua, F. M., Free Energy Via Molecular Simulation: Applications to Chemical and Biomolecular Systems. *Annu Rev Biophys Biophys Chem* **1989**, *18*, 431-492.
39. Paulson, C. N.; John, K.; Baxley, R. M.; Kurniawan, F.; Orellana, K.; Francis, R.; Sobock, A.; Eichman, B. F.; Chazin, W. J.; Aihara, H.; Georg, G. I.; Hawkinson, J. E.; Bielinzky, A. K., The Anti-Parasitic Agent Suramin and Several of Its Analogues Are Inhibitors of the DNA Binding Protein Mcm10. *Open Biol* **2019**, *9* (8), 190117.
40. Pala, D.; Scavini, L.; Elisi, G. M.; Lodola, A.; Mor, M.; Spadoni, G.; Ferrara, F. F.; Pavoni, E.; Roscilli, G.; Milazzo, F. M.; Battistuzzi, G.; Rivara, S.; Giannini, G., New Classes of Potent Heparanase Inhibitors from Ligand-Based Virtual Screening. *J Enzyme Inhib Med Chem* **2020**, *35* (1), 1685-1696.
41. Pillaiyar, T.; Funke, M.; Al-Hroub, H.; Weyler, S.; Ivanova, S.; Schlegel, J.; Abdelrahman, A.; Muller, C. E., Design, Synthesis and Biological Evaluation of Suramin-Derived Dual Antagonists of the Proinflammatory G Protein-Coupled Receptors P2y2 and Gpr17. *Eur J Med Chem* **2020**, *186*, 111789.

42. Marques, A. F.; Esser, D.; Rosenthal, P. J.; Kassack, M. U.; Lima, L. M., Falcipain-2 Inhibition by Suramin and Suramin Analogues. *Bioorg Med Chem* **2013**, *21* (13), 3667-3673.
43. Zhu, W.; Xu, M.; Chen, C. Z.; Guo, H.; Shen, M.; Hu, X.; Shinn, P.; Klumpp-Thomas, C.; Michael, S. G.; Zheng, W., Identification of SARS-Cov-2 3CL Protease Inhibitors by a Quantitative High-Throughput Screening. *bioRxiv* **2020**.
44. Watts, K. S.; Dalal, P.; Murphy, R. B.; Sherman, W.; Friesner, R. A.; Shelley, J. C., Confgen: A Conformational Search Method for Efficient Generation of Bioactive Conformers. *J Chem Inf Model* **2010**, *50* (4), 534-546.
45. Friesner, R. A.; Banks, J. L.; Murphy, R. B.; Halgren, T. A.; Klicic, J. J.; Mainz, D. T.; Repasky, M. P.; Knoll, E. H.; Shelley, M.; Perry, J. K.; Shaw, D. E.; Francis, P.; Shenkin, P. S., Glide: A New Approach for Rapid, Accurate Docking and Scoring. 1. Method and Assessment of Docking Accuracy. *J Med Chem* **2004**, *47* (7), 1739-1749.
46. Dey, D.; Kavanaugh, L. G.; Conn, G. L., Antibiotic Substrate Selectivity of Pseudomonas Aeruginosa MexY and MexB Efflux Systems Is Determined by a Goldilocks Affinity. *Antimicrob Agents Chemother* **2020**, *64* (8), e00496-00420.
47. Sastry, M.; Lowrie, J. F.; Dixon, S. L.; Sherman, W., Large-Scale Systematic Analysis of 2D Fingerprint Methods and Parameters to Improve Virtual Screening Enrichments. *J Chem Inf Model* **2010**, *50* (5), 771-784.
48. Fu, L.; Niu, B.; Zhu, Z.; Wu, S.; Li, W., Cd-Hit: Accelerated for Clustering the Next-Generation Sequencing Data. *Bioinformatics* **2012**, *28* (23), 3150-3152.
49. Kumar, S.; Stecher, G.; Tamura, K., MEGA7: Molecular Evolutionary Genetics Analysis Version 7.0 for Bigger Datasets. *Mol Biol Evol* **2016**, *33* (7), 1870-1874.
50. Ashkenazy, H.; Abadi, S.; Martz, E.; Chay, O.; Mayrose, I.; Pupko, T.; Ben-Tal, N., ConSurf 2016: An Improved Methodology to Estimate and Visualize Evolutionary Conservation in Macromolecules. *Nucleic Acids Res* **2016**, *44* (W1), W344-350.

## **For Table of Contents Use Only**

### **Table of Contents Graphic**

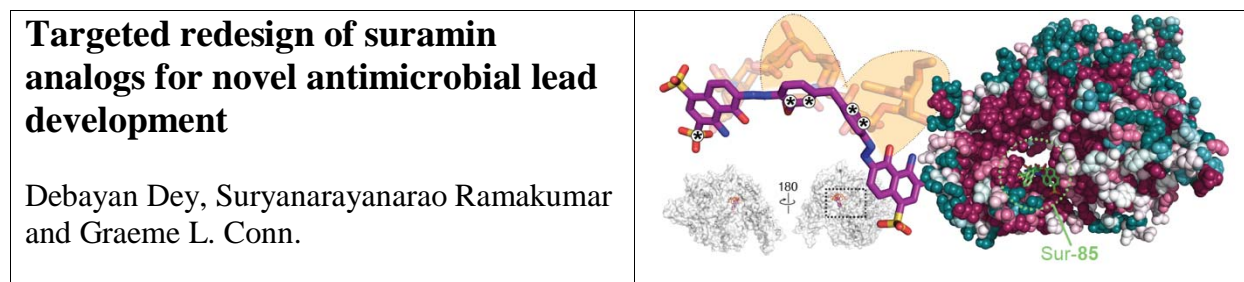

Source: http://biorxiv.org/content/10.1101/2021.05.17.444489v2.full.pdf
